# Supplementary material for: Arterial Stiffness Is Positively Associated With 18F-fluorodeoxyglucose Positron Emission Tomography–Assessed Subclinical Vascular Inflammation in People With Early Type 2 Diabetes
Source: Oxford University Press journal article supplement (doi:10.2337/dc16-0327), 2016-06-08
Supplement: dc160327supplementarydata.pdf [file dc160327supplementarydata.pdf]

# SUPPLEMENTARY DATA

**Supplementary Table 1.**

|                          | <b>Calcified plaque score (circumference)</b> |                    |                   |                   |                    |
|--------------------------|-----------------------------------------------|--------------------|-------------------|-------------------|--------------------|
|                          | <b>0</b>                                      | <b>1 (&lt;10%)</b> | <b>2 (10-25%)</b> | <b>3 (25-50%)</b> | <b>4 (&gt;50%)</b> |
| <i><b>Segment 1</b></i>  |                                               |                    |                   |                   |                    |
| Left carotid artery (n)  | 36 (81.8%)                                    | 7 (15.9%)          | 1 (2.3%)          | 0                 | 0                  |
| Right carotid artery (n) | 33 (75%)                                      | 10 (22.7%)         | 1 (2.3%)          | 0                 | 0                  |
| <i><b>Segment 2</b></i>  |                                               |                    |                   |                   |                    |
| Ascending aorta (n)      | 41 (93.2%)                                    | 1 (2.3%)           | 2 (4.6%)          | 0                 | 0                  |
| Aortic arch (n)          | 24 (54.5%)                                    | 13 (29.5%)         | 7 (15.9%)         | 0                 | 0                  |
| <i><b>Segment 3</b></i>  |                                               |                    |                   |                   |                    |
| Descending aorta (n)     | 28 (63.6%)                                    | 9 (20.5%)          | 6 (13.6%)         | 1 (2.3%)          | 0                  |
| Abdominal aorta (n)      | 13 (29.5%)                                    | 4 (9.1%)           | 8 (18.2%)         | 12 (27.3%)        | 7 (15.9%)          |
| <i><b>Segment 4</b></i>  |                                               |                    |                   |                   |                    |
| Left iliac artery (n)    | 17 (38.6%)                                    | 10 (22.7%)         | 9 (20.5%)         | 6 (13.6%)         | 2 (4.5%)           |
| Right iliac artery (n)   | 16 (36.4%)                                    | 7 (15.9%)          | 7 (15.9%)         | 13 (29.5%)        | 1 (2.3%)           |
| Left femoral artery (n)  | 24 (54.5%)                                    | 14 (31.8%)         | 6 (13.6%)         | 0                 | 0                  |
| Right femoral artery (n) | 28 (63.6%)                                    | 10 (27.7%)         | 5 (11.4%)         | 1 (2.3%)          | 0                  |

Values are n (percentage of arteries). The numbers do not add up to the total study population but to the total assessed arterial sites (n=440).

SUPPLEMENTARY DATA

**Supplementary Table 2**

| <i>Dependent:</i><br><i>meanTBR</i> | <b>Model 5 (<math>R^2 = 0.57</math>. <math>p &lt; 0.001</math>)</b> |           |                               |          | <b>Model 6 (<math>R^2 = 0.59</math>. <math>p = 0.002</math>)</b> |           |                               |          |
|-------------------------------------|---------------------------------------------------------------------|-----------|-------------------------------|----------|------------------------------------------------------------------|-----------|-------------------------------|----------|
|                                     | <b>B</b>                                                            | <b>SE</b> | <b>St. <math>\beta</math></b> | <b>P</b> | <b>B</b>                                                         | <b>SE</b> | <b>St. <math>\beta</math></b> | <b>P</b> |
|                                     | <b>Value</b>                                                        |           |                               |          | <b>Value</b>                                                     |           |                               |          |
| <b>Pulse Wave Velocity</b>          | .064                                                                | .027      | .328                          | .024     | .059                                                             | .028      | .301                          | .046     |
| <b>central SBP</b>                  | .005                                                                | .002      | .258                          | .050     | .005                                                             | .002      | .263                          | .051     |
| <b>Age</b>                          | .003                                                                | .005      | .105                          | .482     | .004                                                             | .005      | .128                          | .437     |
| <b>Gender</b>                       | .014                                                                | .072      | .025                          | .853     | -.005                                                            | .075      | -.009                         | .951     |
| <b>BMI</b>                          | .009                                                                | .008      | .186                          | .246     | .013                                                             | .009      | .251                          | .181     |
| <b>HbA<sub>1c</sub></b>             | .180                                                                | .092      | .267                          | .059     | .175                                                             | .096      | .260                          | .080     |
| <b>Hs-CRP*</b>                      | -.049                                                               | .040      | -.183                         | .235     | -.057                                                            | .042      | -.217                         | .178     |
| <b>Triglycerides</b>                | .062                                                                | .053      | .180                          | .253     | .060                                                             | .056      | .177                          | .287     |
| <b>HDL cholesterol</b>              | -.061                                                               | .117      | -.074                         | .603     | -.048                                                            | .122      | -.057                         | .700     |
| <b>Statin use</b>                   |                                                                     |           |                               |          | .077                                                             | .073      | .144                          | .304     |
| <b>Antihypertensive use</b>         |                                                                     |           |                               |          | -.009                                                            | .075      | -.017                         | .902     |

Multiple linear regression analyses with the stepwise addition of several covariates to evaluate the association of pulse wave velocity and subclinical vascular inflammation (*meanTBR*).

B = Coefficient  $\beta$ . SE = Standard Error. st.  $\beta$  = Standardized Coefficient  $\beta$ .\*= logarithmic transformation.
